# Supplementary material for: Bi nanoparticles confined in N,S co-doped carbon nanoribbons with excellent rate performance for sodium-ion batteries
Source: Royal Society of Chemistry journal article supplement (doi:10.1039/d3dt01015e), 2023-01-01
Supplement: d3dt01015e1.pdf [file d3dt01015e1.pdf]

## Supplementary Materials

### Bi nanoparticles confined in N, S co-doped carbon nanoribbon with excellent rate performance for Sodium-ion Batteries

Guirong Huang, Qiushi Huang, Zhe Cui, Jinqi Zhu, Mengluan Gao, Wenqing Wang, Fuming Weng, Qian Liu\* and Rujia Zou\*

State Key Laboratory for Modification of Chemical Fibers and Polymer Materials, College of Science, College of Materials Science and Engineering, Donghua University, Shanghai 201620, China. E-mail: rjzou@dhu.edu.cn; qianliu@dhu.edu.cn

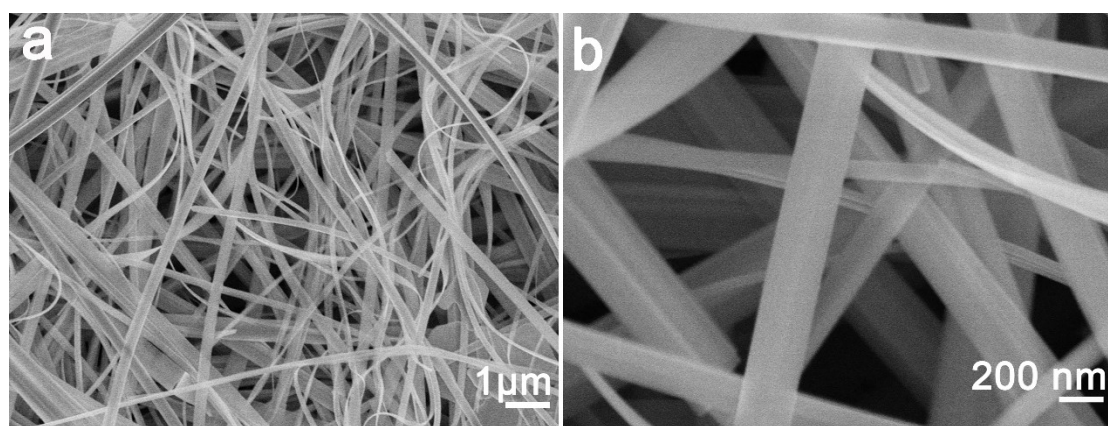

Fig. S1 (a) and (b) SEM image of Bi<sub>2</sub>S<sub>3</sub> nanobelts.

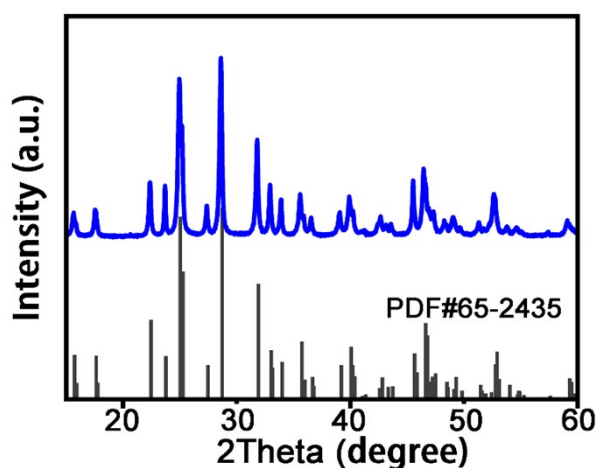

Fig. S2 XRD patterns of Bi<sub>2</sub>S<sub>3</sub> nanobelts.

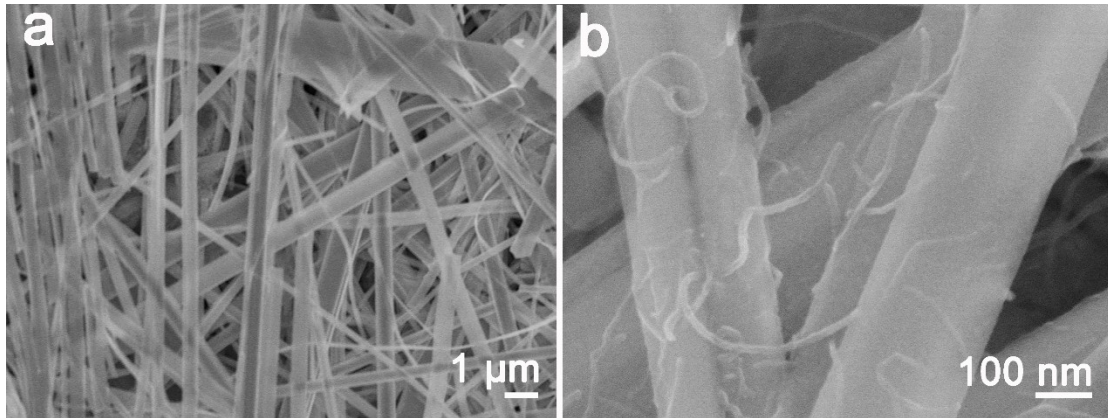

Fig. S3 (a) and (b) SEM image of  $\text{Bi}_2\text{S}_3$  @PDA/CNT composites.

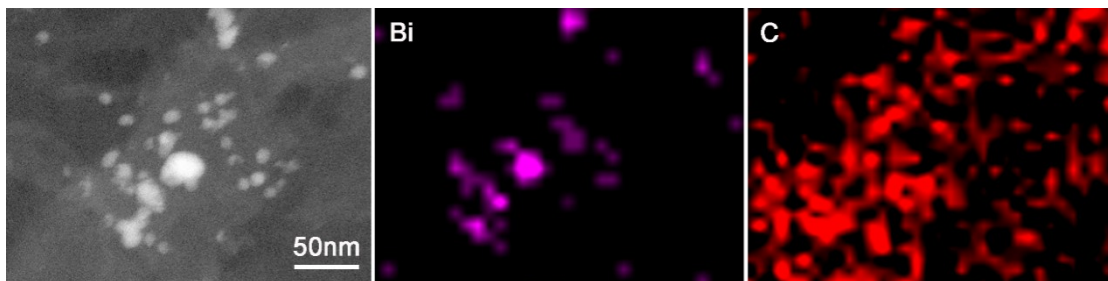

Fig. S4 STEM image and the corresponding Bi, C elemental mapping images of N,S-C@Bi/CNT composites.

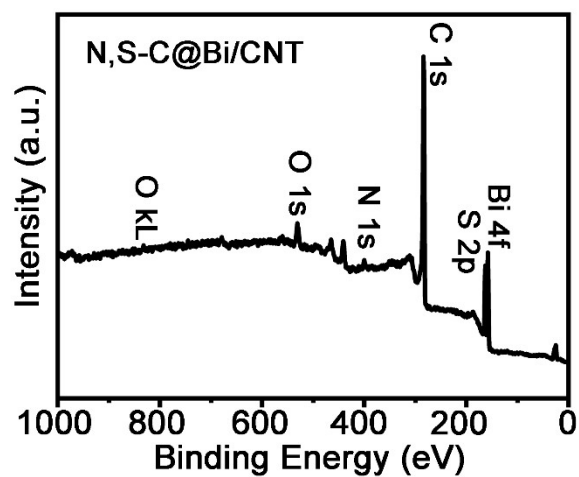

Fig. S5 The wide scan XPS spectra for N,S-C@Bi/CNT composites.

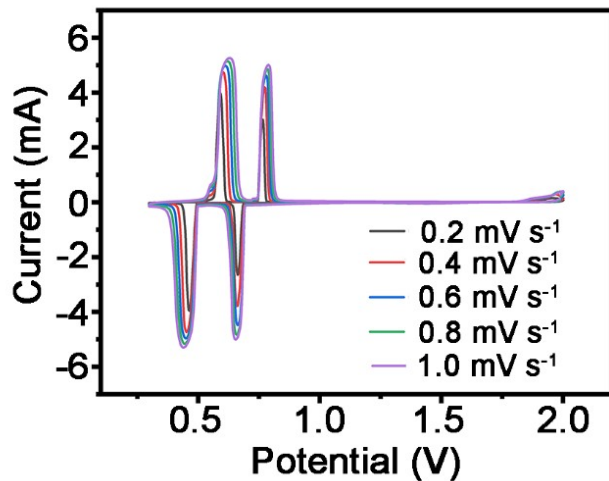

Fig. S6 CV profiles of N,S-C@Bi/CNT anode at different scan rate

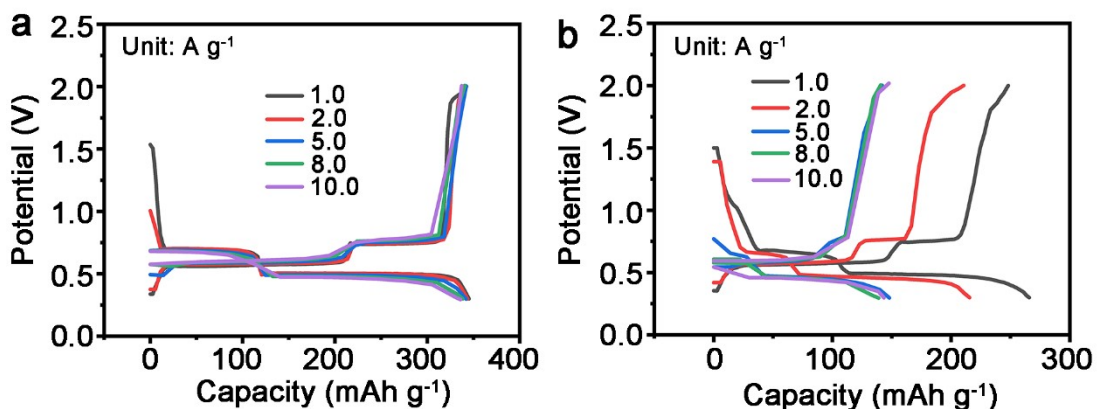

Fig. S7 Discharge-charge profiles at different current densities of N,S-C@Bi/CNT (a) and pure Bi (b).

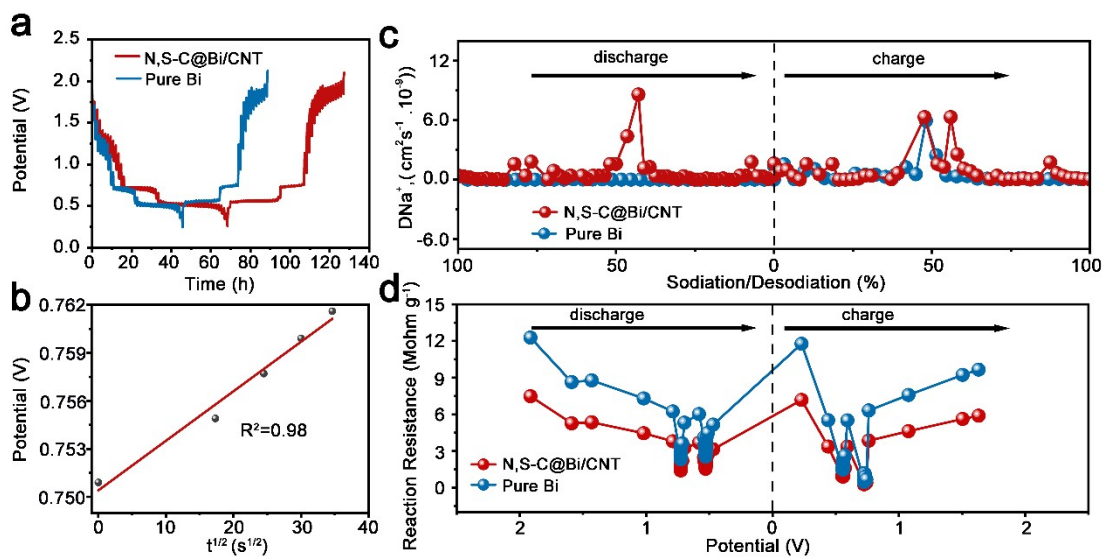

Fig. S8 (a) GITT potential response curve with a time of N,S-C@Bi/CNT and pure Bi electrodes. (b) The linear relation between the voltage and square root of the pulse time. (c)  $\text{Na}^+$  diffusion coefficient at different sodiation/desodiation states of the N,S-C@Bi/CNT and Pure Bi electrodes. (d) In situ reaction resistance during the discharge/charge process calculated by GITT measurement of N,S-C@Bi/CNT and pure Bi electrodes.

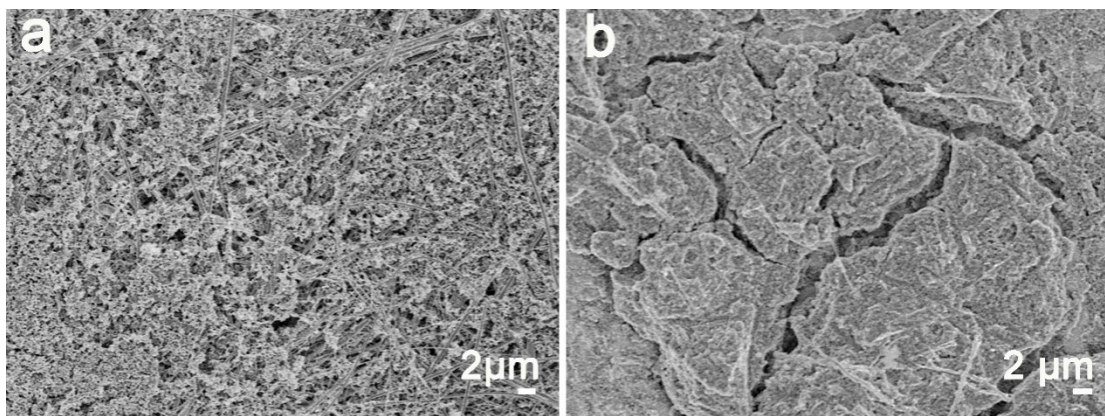

Fig. S9 (a) SEM images of the N,S-C@Bi/CNT electrode after the 300th cycle at a high current density of  $1.0 \text{ A g}^{-1}$ . (c) SEM image of the pure Bi electrode after the 300th cycle at a high current density of  $1.0 \text{ A g}^{-1}$ .
